# Supplementary material for: Cancer incidence and mortality in Poland in 2019
Source: PubMed Central journal article supplement (PMC9237124; doi:10.1038/s41598-022-14779-6), 2022-06-27
Supplement: 41598_2022_14779_MOESM1_ESM.pdf [file 41598_2022_14779_MOESM1_ESM.pdf]

**Supplementary material – Figures**

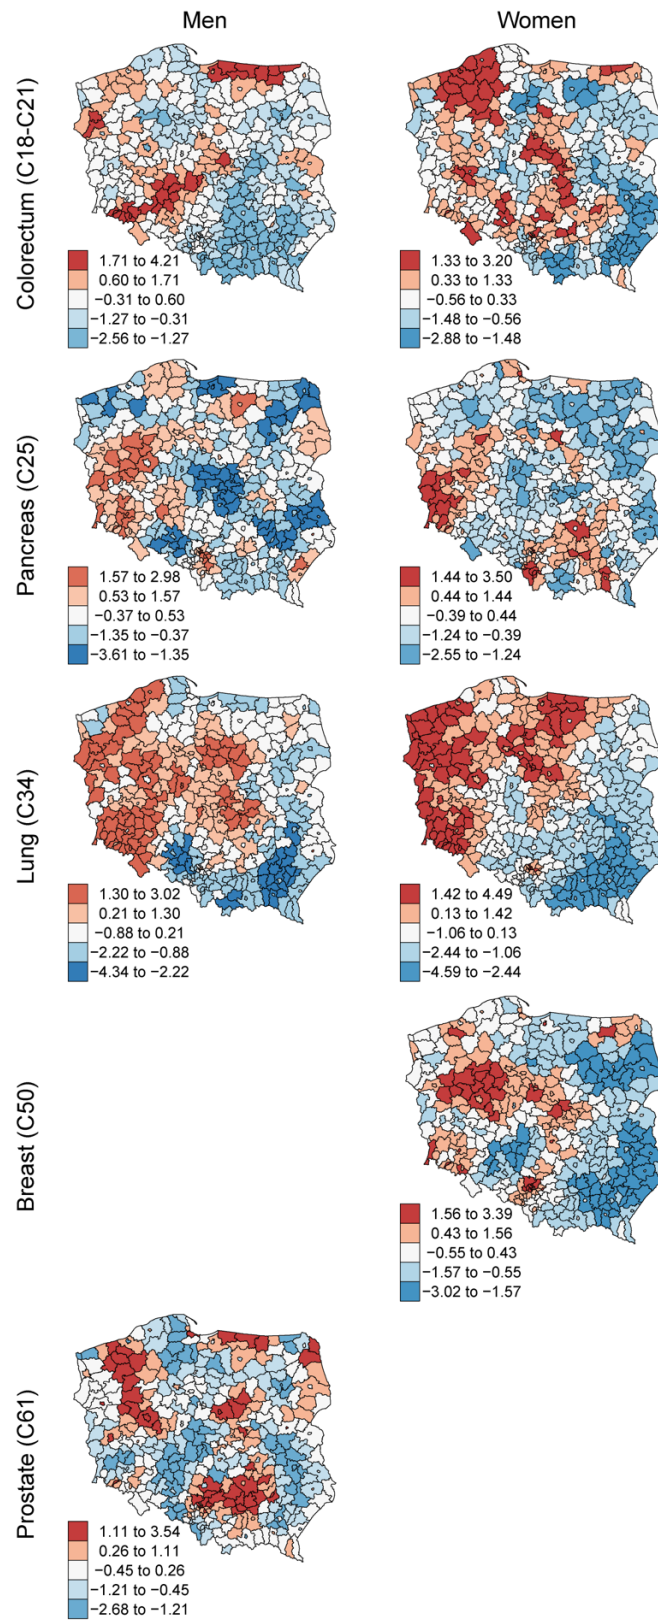

**Figure S1.** Getis-Ord  $G_i^*$  for selected high mortality cancer-sites, by sex, powiat level - Poland, 2019.
